# Supplementary material for: microRNA-155 inhibition restores Fibroblast Growth Factor 7 expression in diabetic skin and decreases wound inflammation
Source: PubMed Central journal article supplement (PMC6456606; doi:10.1038/s41598-019-42309-4), 2019-04-09
Supplement: 41598_2019_42309_MOESM1_ESM.pdf [file 41598_2019_42309_MOESM1_ESM.pdf]

## **Title**

microRNA-155 inhibition restores Fibroblast Growth Factor 7 expression in diabetic skin and decreases wound inflammation

## **Author list**

João Moura, Anja Sørensen, Ermelindo C. Leal, Rikke Svendsen, Lina Carvalho, Rie Juul Willemoes, Per Trolle Jørgensen, Håvard Jenssen, Jesper Wengel, Louise Torp Dalgaard, Eugénia Carvalho

## Supplementary Figure 1

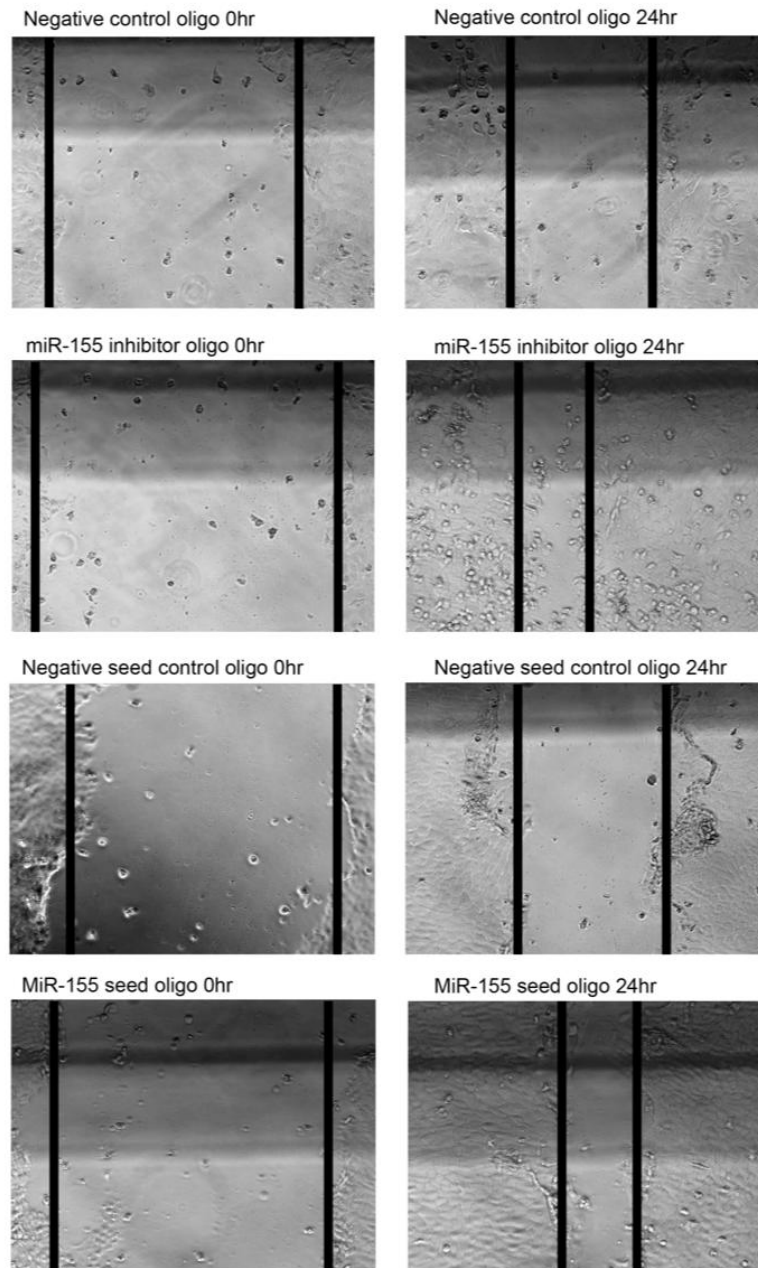

**Suppl. Fig. 1. Representative phase contrast microscope images from HaCaT scratch migration assays.** For scratch migration assays, HaCaT cells were seeded in plates and allowed to adhere for 24hrs, before transfection with miR inhibitors. After 24hrs the medium was changed and scratches were performed. Following washes in medium to remove non-adherent cells, microscope images were acquired at time zero and 24hrs later. Distance between scratch edges was calculated using ImageJ and are presented as percentage of remaining scratch after 24hrs and averages are presented in Figure 4C.

## Supplementary Figure 2

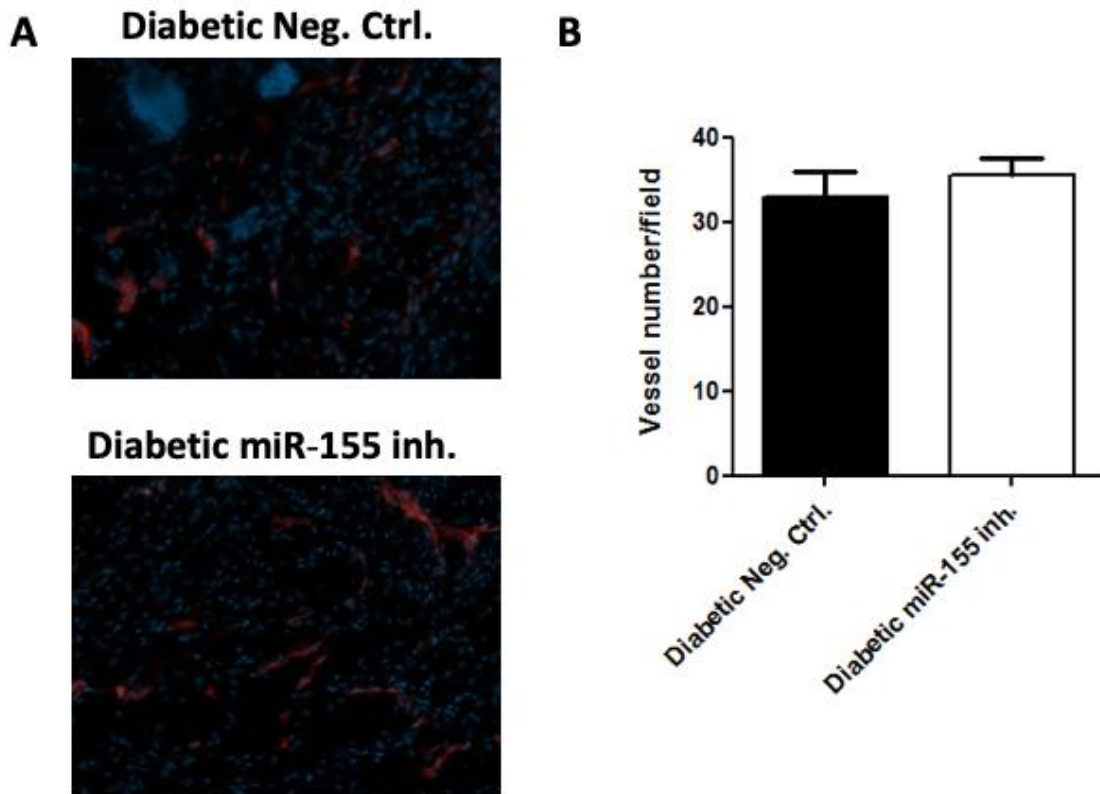

**Suppl. Fig. 2. Effects of topical inhibition of miR-155 on CD31+ positive endothelial cells.** (A) Representative fluorescence microscopy images of CD31+ endothelial cells in wound skin tissue of diabetic mice treated with 2.5 nmol Neg. Ctrl. oligo (control) or 2.5 nmol miR-155 inhibitor, collected at day 10 post-wounding (n=3 for each group with one representative example per group shown). (B) Quantifications of the number of CD31+ endothelial cells. Blue – DAPI, Red – CD31. The results were analyzed using student's t-test.

**Supplementary table 1 - Oligonucleotide sequences used for RT-qPCR and cloning**

| microRNA                               | Type    | Oligo sequence                                  |
|----------------------------------------|---------|-------------------------------------------------|
| miR-31-5p                              | Reverse | 5'CTCAACTGGTGTTCGTGGAGTCGGCAATTCAGTTGAGCAGCTATG |
|                                        | Forward | 5'ACACTCCAGCTGGGAGGCAAGATGCTGGCA                |
| miR-210-3p                             | Reverse | 5'CTCAACTGGTGTTCGTGGAGTCGGCAATTCAGTTGAGTCAGCCGC |
|                                        | Forward | 5'ACACTCCAGCTGGGCTGTGCGTGTGACAGC                |
| miR-409-3p                             | Reverse | 5'CTCAACTGGTGTTCGTGGAGTCGGCAATTCAGTTGAGAGGGGTTC |
|                                        | Forward | 5'ACACTCCAGCTGGGGAATGTTGCTCGGTGA                |
| miR-324-3p                             | Reverse | 5'CTCAACTGGTGTTCGTGGAGTCGGCAATTCAGTTGAGCCAGCAGC |
|                                        | Forward | 5'ACACTCCAGCTGGGACTGCCCCAGGTGC                  |
| miR-411-5p                             | Reverse | 5'CTCAACTGGTGTTCGTGGAGTCGGCAATTCAGTTGAGCGTACGCT |
|                                        | Forward | 5'ACACTCCAGCTGGGTAGTAGACCGTATAG                 |
| miR-31-3p                              | Reverse | 5'CTCAACTGGTGTTCGTGGAGTCGGCAATTCAGTTGAGGATGGCAA |
|                                        | Forward | 5'ACACTCCAGCTGGGTGCTATGCCAACATATT               |
| miR-93-5p,<br>miR-106-5p,<br>miR-17-5p | Reverse | 5'CTCAACTGGTGTTCGTGGAGTCGGCAATTCAGTTGAGCTACCTGC |
| miR-93-3p                              | Forward | 5'ACACTCCAGCTGGGCAAAGTGCTGTTTCGTGC              |
| miR-106-5p                             | Forward | 5'ACACTCCAGCTGGGCAAAGTGCTAACAGTGC               |
| miR-17-5p                              | Forward | 5'ACACTCCAGCTGGGCAAAGTGCTTACAGTGC               |
| miR-127-3p                             | Reverse | 5'CTCAACTGGTGTTCGTGGAGTCGGCAATTCAGTTGAGAGCCAAGC |
|                                        | Forward | 5'ACACTCCAGCTGGGTCCGATCCGTCTGAGC                |
| miR-503-5p                             | Reverse | 5'CTCAACTGGTGTTCGTGGAGTCGGCAATTCAGTTGAGCTGCAGTA |
|                                        | Forward | 5'ACACTCCAGCTGGGTAGCAGCGGGAACAGTA               |
| miR-188-5p                             | Reverse | 5'CTCAACTGGTGTTCGTGGAGTCGGCAATTCAGTTGAGCCCTCCAC |
|                                        | Forward | 5'ACACTCCAGCTGGGCATCCCTTGATGGT                  |
| miR-146a-5p                            | Reverse | 5'CTCAACTGGTGTTCGTGGAGTCGGCAATTCAGTTGAGAACCCATG |
|                                        | Forward | 5'ACACTCCAGCTGGGTGAGAAGTGAATTCCA                |
| MiR-126-5p                             | Reverse | 5'CTCAACTGGTGTTCGTGGAGTCGGCAATTCAGTTGAGCGCGTACC |
|                                        | Forward | 5'ACACTCCAGCTGGGCATTATTACTTTTGG                 |
| miR-155-5p                             | Reverse | 5'CTCAACTGGTGTTCGTGGAGTCGGCAATTCAGTTGAGACCCCTAT |
|                                        | Forward | 5'ACACTCCAGCTGGGTTAATGCTAATTGTGAT               |
| miR-29a                                | Reverse | 5'ACACTCCAGCTGGGTAGCACCATCTGAAAT                |
|                                        | Forward | 5'CTCAACTGGTGTTCGTGGAGTCGGCAATTCAGTTGAGTAACCGAT |
| miR-21-5p                              | Reverse | 5'CTCAACTGGTGTTCGTGGAGTCGGCAATTCAGTTGAGTCAACATC |
|                                        | Forward | 5'ACACTCCAGCTGGGTAGCTTATCAGACTGA                |
| URP universal                          | Reverse | 5'GTTCTGCTCCAACCTTTGCCT                         |
| TFIIB                                  | Forward | 5'GTTCTGCTCCAACCTTTGCCT                         |
|                                        | Reverse | 5'TGTGTAGCTGCCATCTGCACTT                        |
| U6                                     | Reverse | 5'AACGCTTCACGAATTTGCGT                          |
|                                        | Forward | 5'CTCGCTTCGGCAGCACA                             |
| Dicer                                  | Forward | 5'TGCTGCAGTAAGCTGTGCTA                          |
|                                        | Reverse | 5'CATTGGTGAGGAAGCAGGGG                          |
| Dgcr8                                  | Forward | 5'CGAGCCACCCTGGAAATTCT                          |
|                                        | Reverse | 5'GATGTGGTTAAAATACTCCAGTTCT                     |

|                   |         |                                         |
|-------------------|---------|-----------------------------------------|
| Exp5              | Forward | 5'TGTCACATACAAGCCTGCGT                  |
|                   | Reverse | 5'AGTCCTGGGGGCCTTACTTT                  |
| Drosha 1          | Forward | 5'TTTAATTCCCGGGGCTTCCT                  |
|                   | Reverse | 5'CCTGCAGGATTCACAGTCTCTAC               |
| Drosha 2          | Forward | 5'CGGGACTCTCTAGACTGTGA                  |
|                   | Reverse | 5'GCTACATCTTCCGCTCACGA                  |
| Tarbp1            | Forward | 5'ACGGAGGAGGGAATGAGTGA                  |
|                   | Reverse | 5'CTGAAGAAGGCTGATCGGGG                  |
| Tarbp2            | Forward | 5'GAGGCTGTAGTCACGGTGG                   |
|                   | Reverse | 5'TCTAGGAGAGAAAAAGAACTGGG               |
| Ago4              | Forward | 5'CGCTTCAGCGCCAATATTCC                  |
|                   | Reverse | 5'CGAATTGGTTTCCCAACGGT                  |
| FGF7 UTR          | Forward | 5'ACGT TCTAGA AAACCAGTTTCATTCAGCAGGGA   |
| FGF7 UTR WT       | Reverse | 5'ACGTGGCCGGCCAGTTTAATGCTGTAATCACAGAGGG |
| FGF7 UTR mut<br>1 | Reverse | 5'ACGTGGCCGGCCAGTTTTTAGCtGtAATCACAGAGGG |
| FGF7 UTR mut<br>2 | Forward | 5'CTTCAAATCTTTCTAGCTAAAAGTCTTTTAAAAT    |
|                   | Reverse | 5'ATTTTAAAAGACTTTTAGCTAGAAAGATTTGAAG    |
